# Supplementary material for: Tracking Sweet Potato Leaf Curl Virus through Field Production: Implications for Sustainable Sweetpotato Production and Breeding Practices
Source: MDPI journal article supplement (doi:10.3390/plants13091267), 2024-05-02

# TRACKING SPLCV – Supplementary Data – QIACUITY SCATTERPLOTS

Figure S1

## TEST 1: Early-Season Roots (56 DAP)

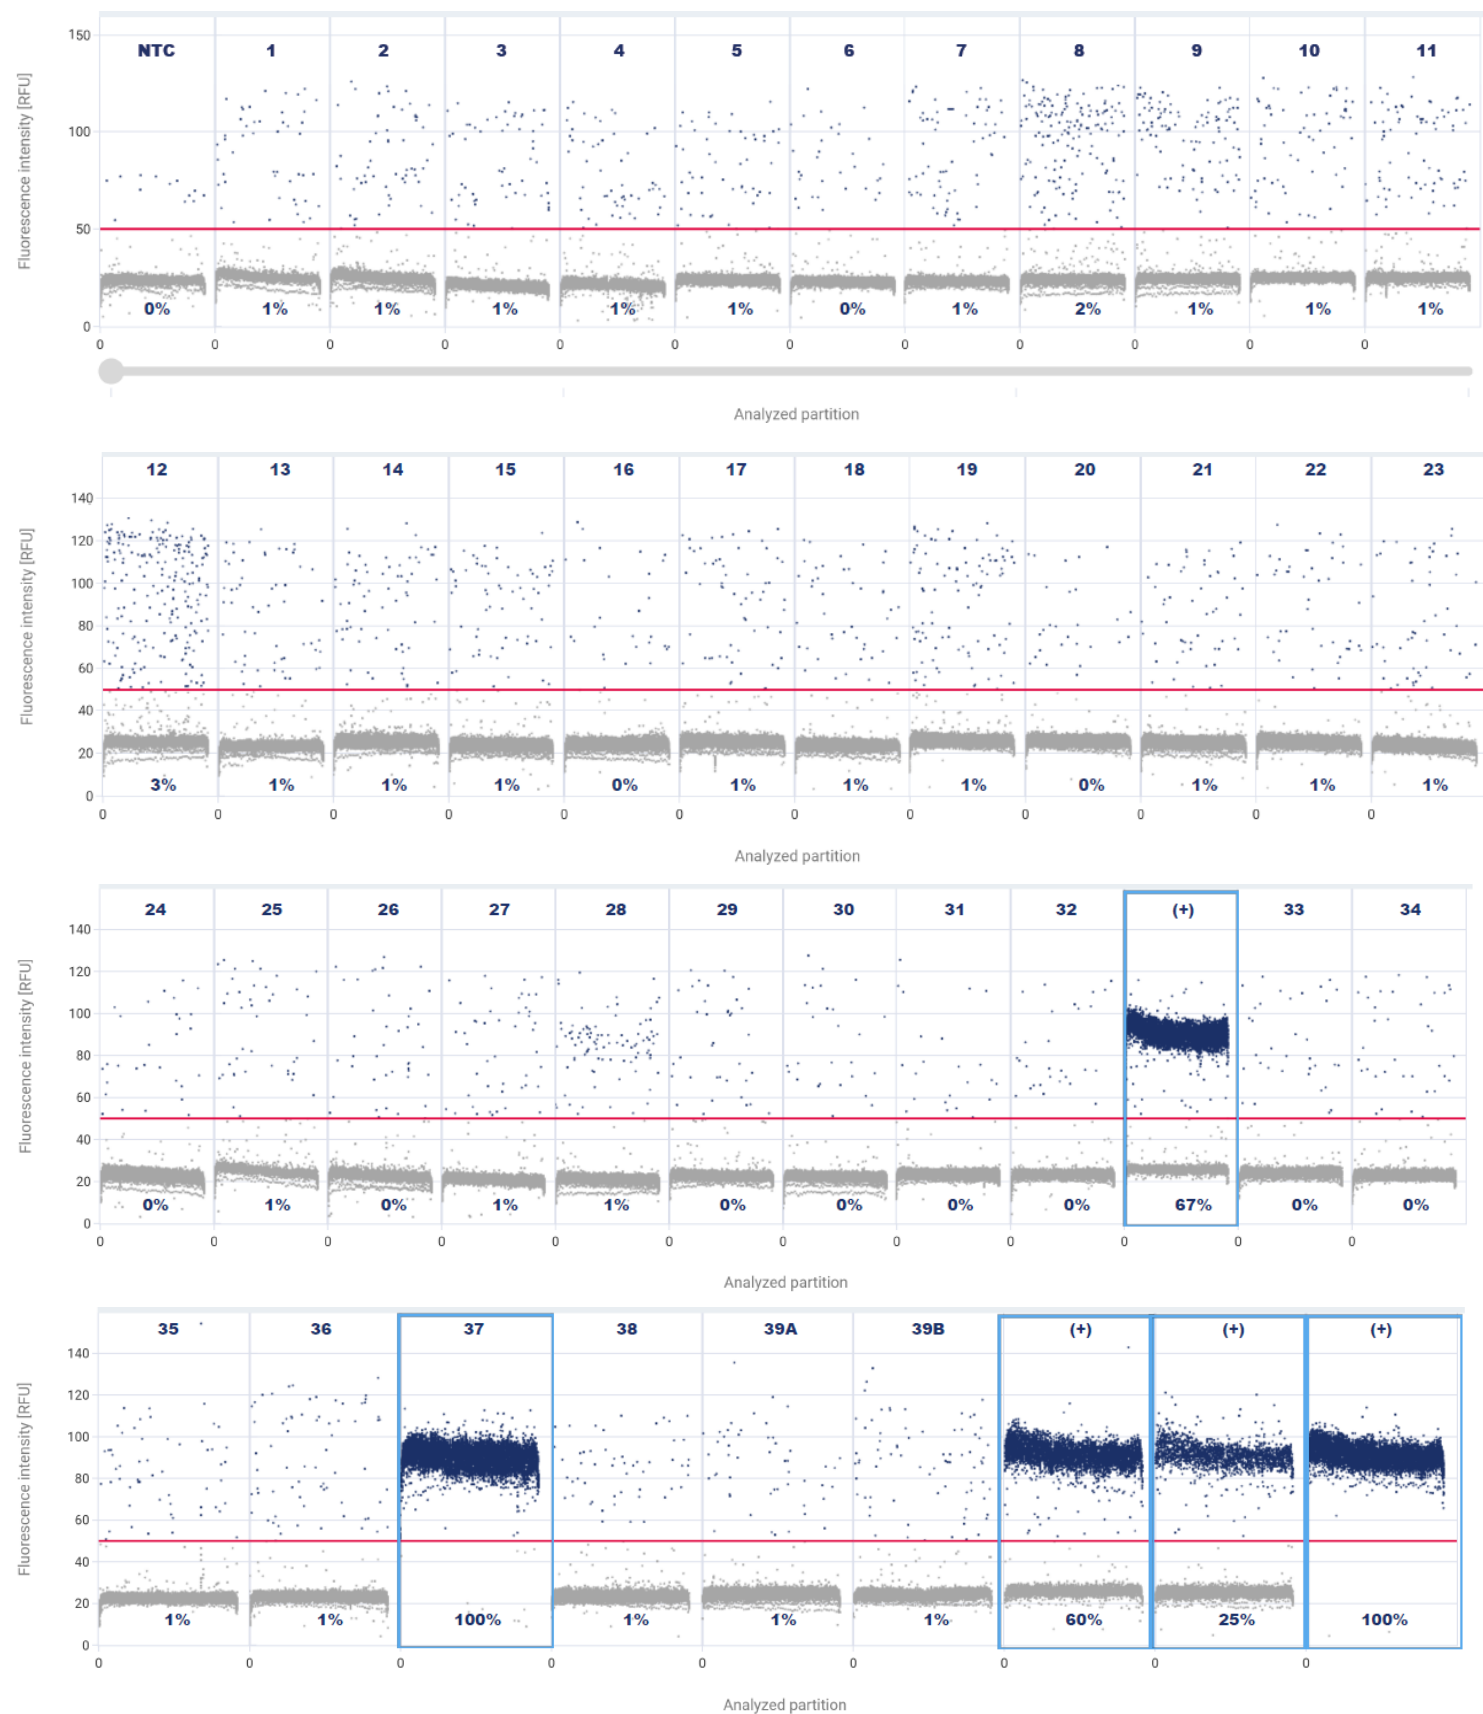

**TEST 2: Early/Late-Season Leaves (81/0 DAP)**

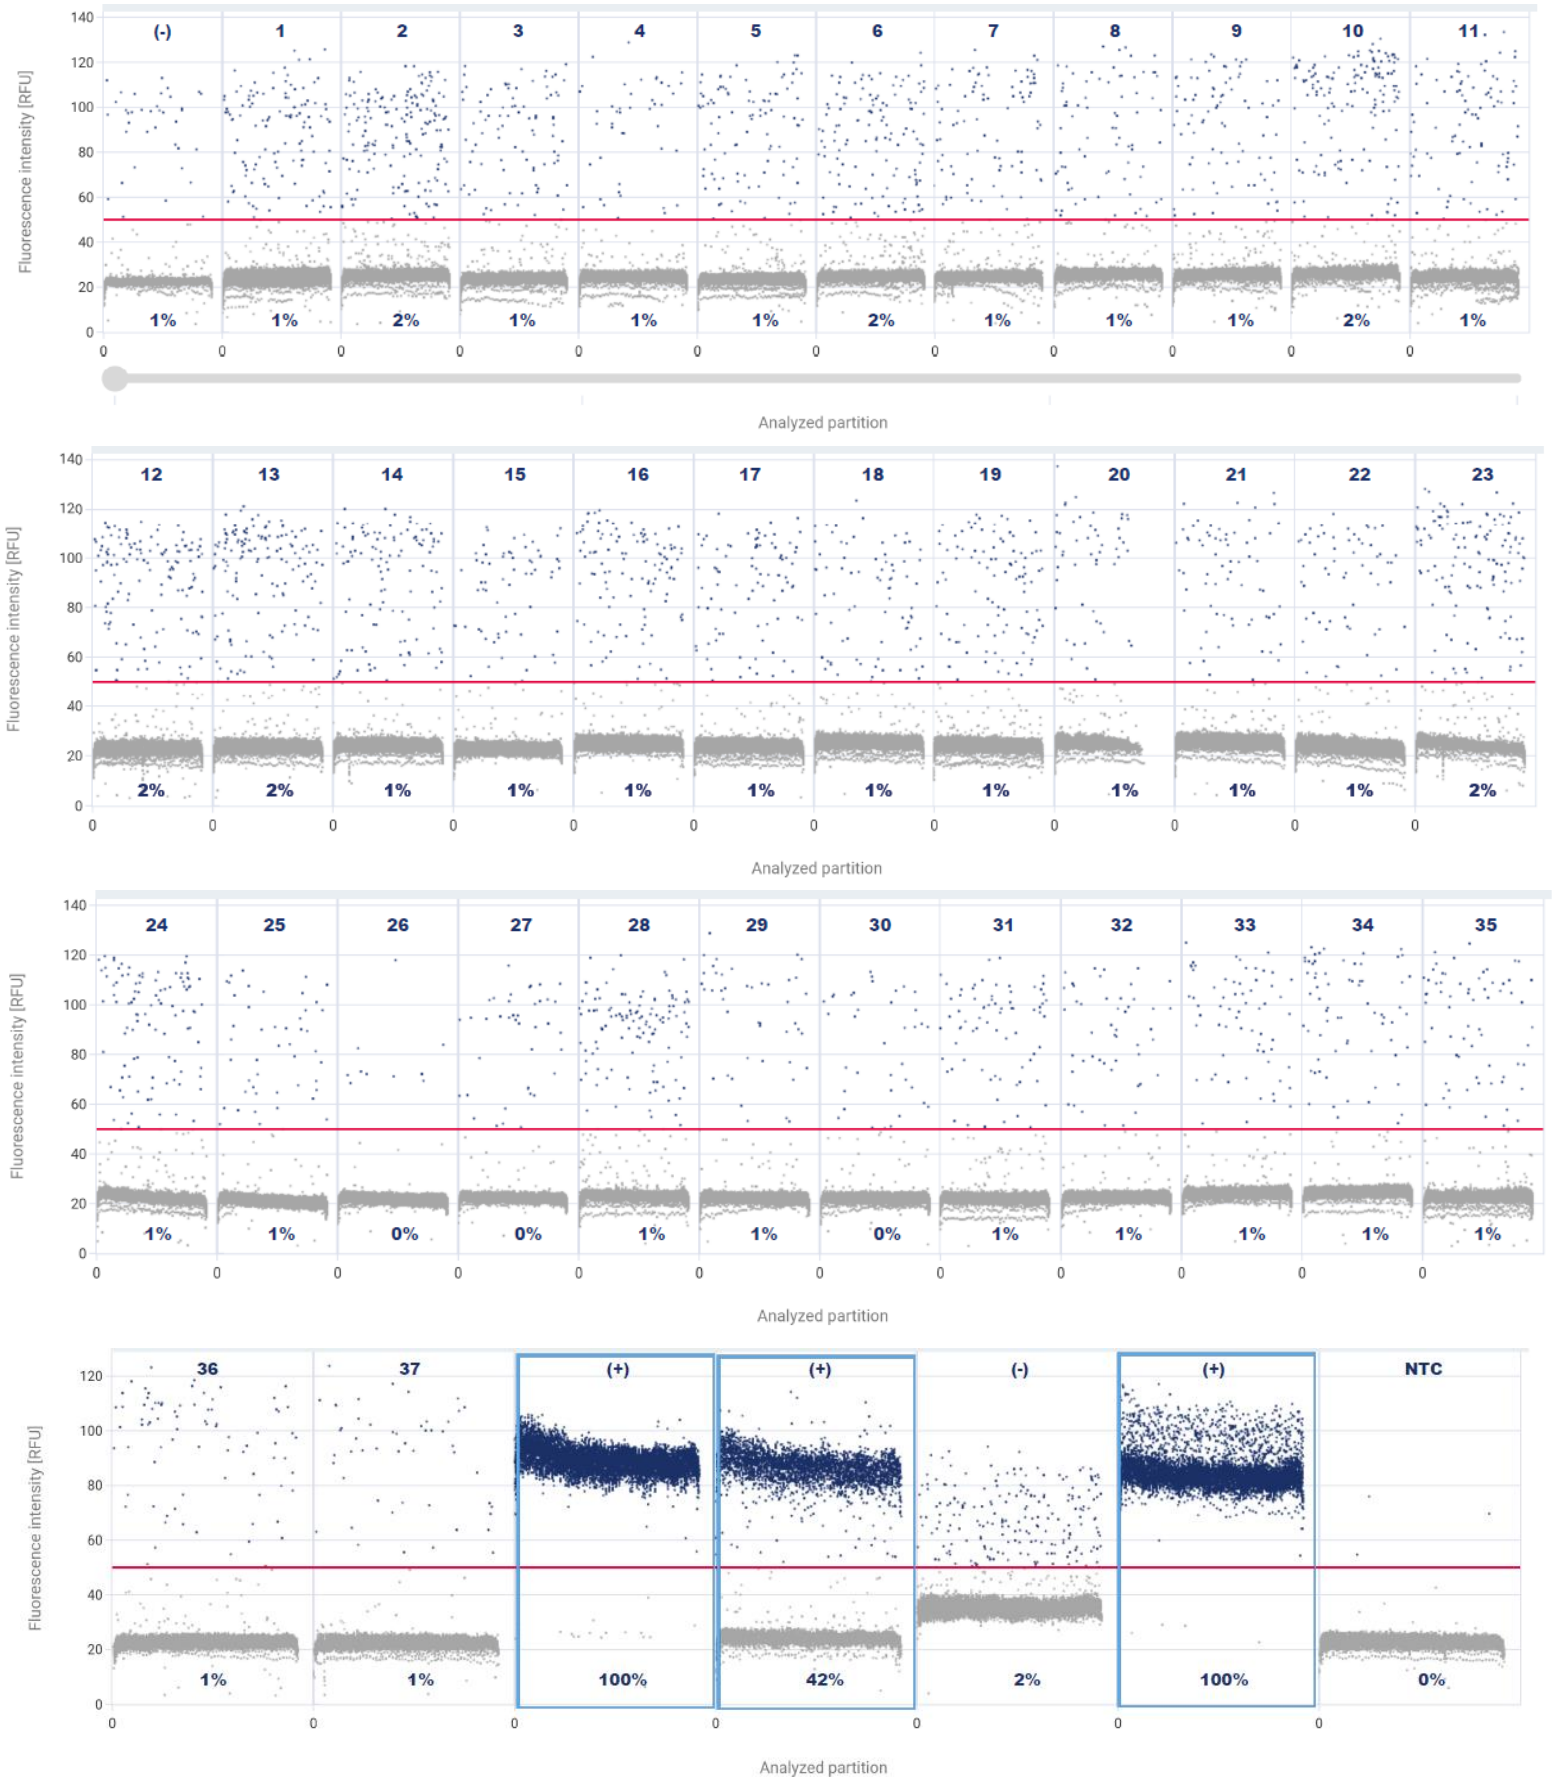

TEST 3: Late-Season Leaves (60 DAP)

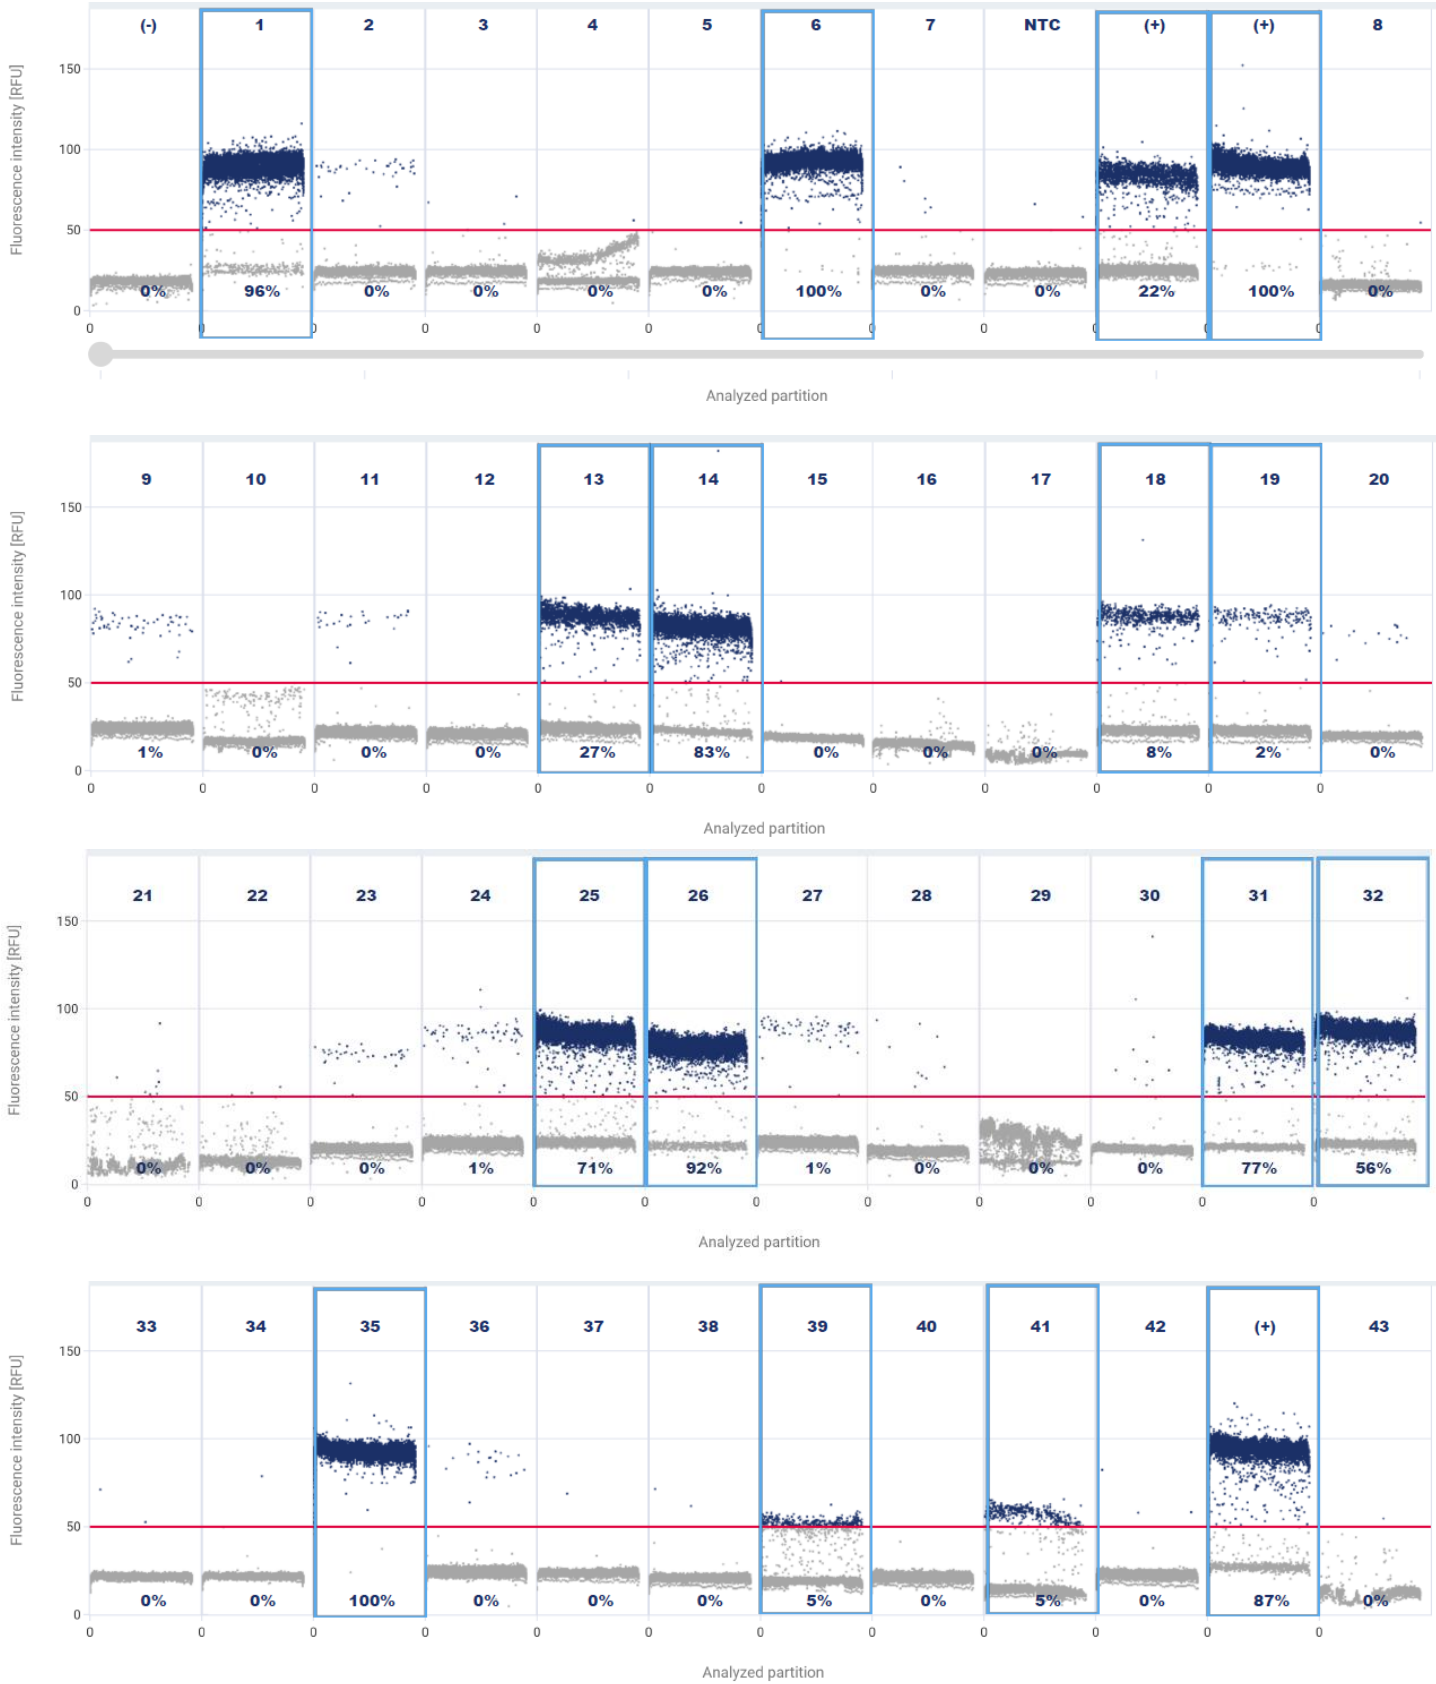

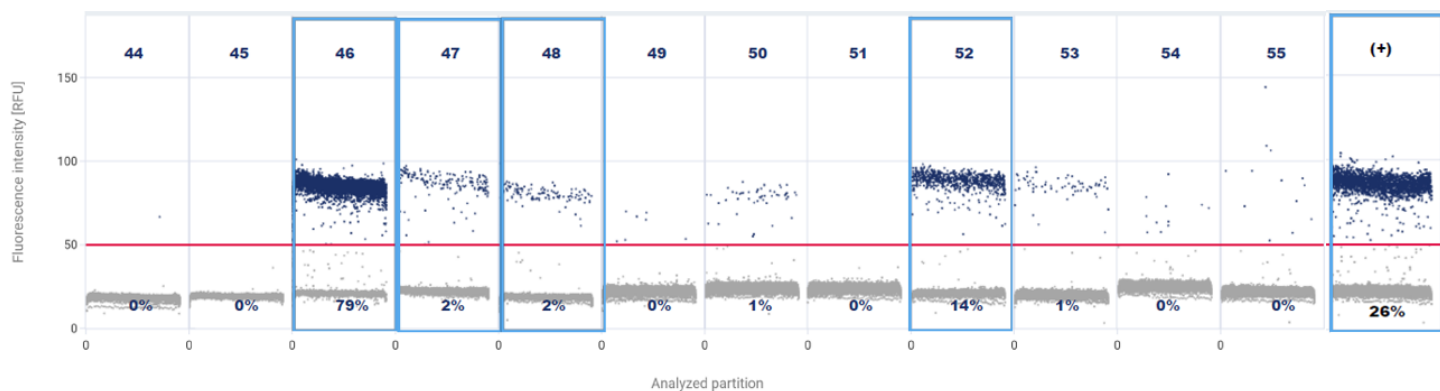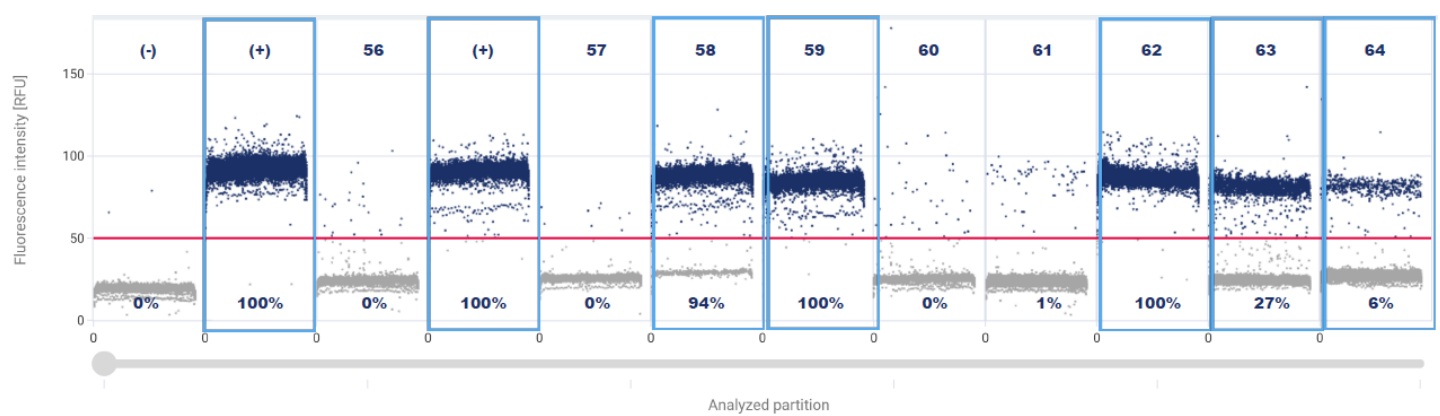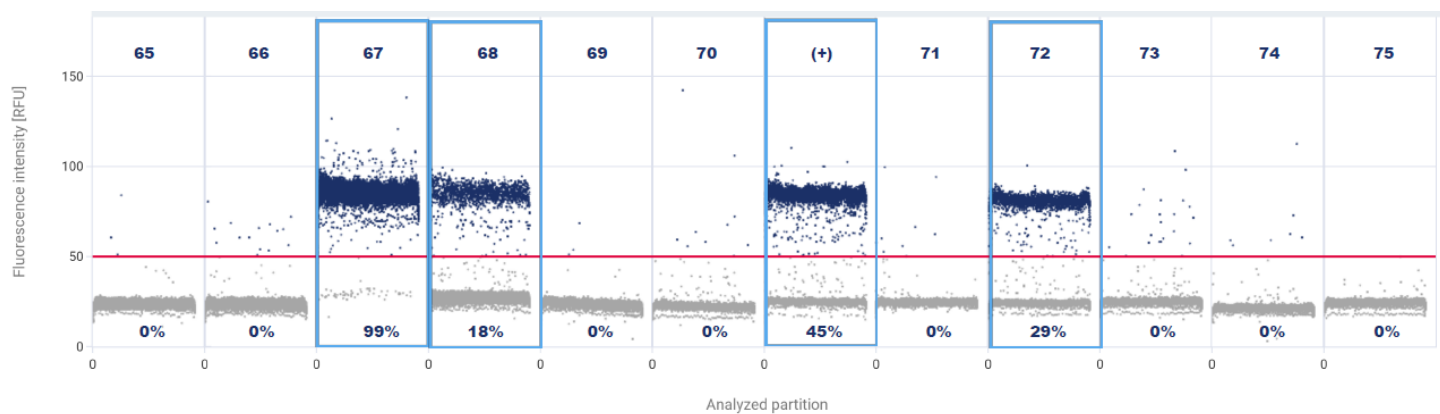

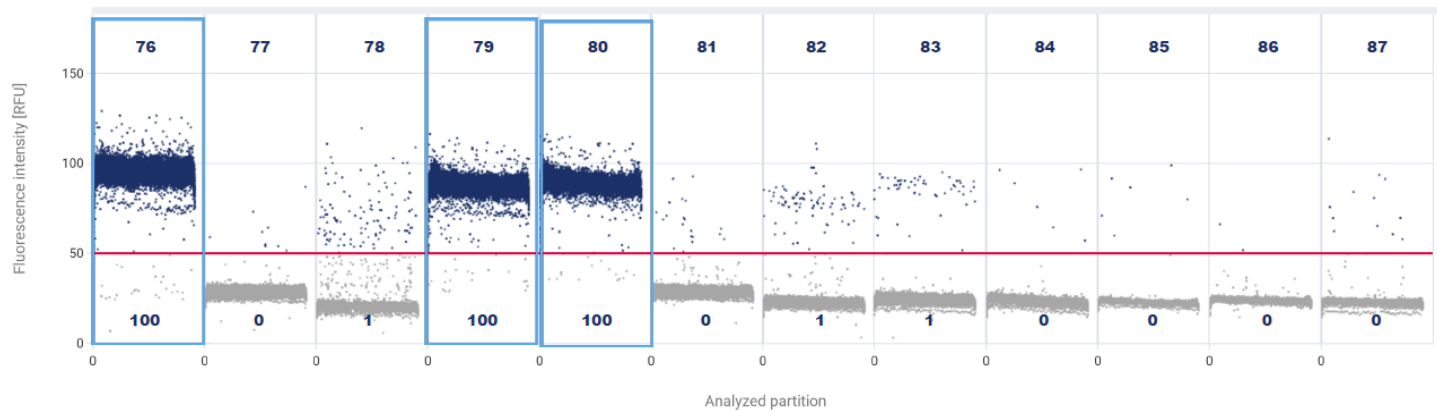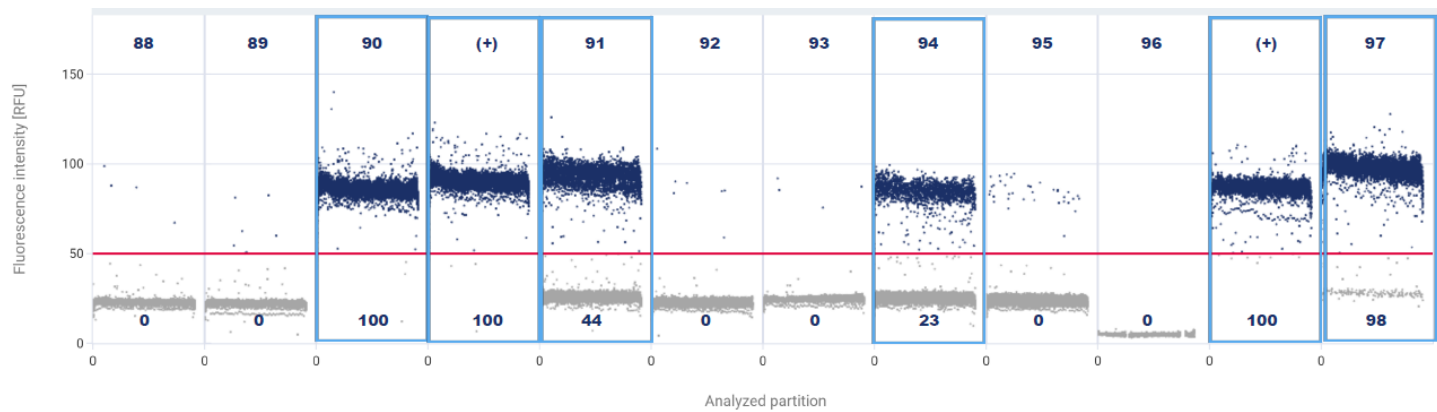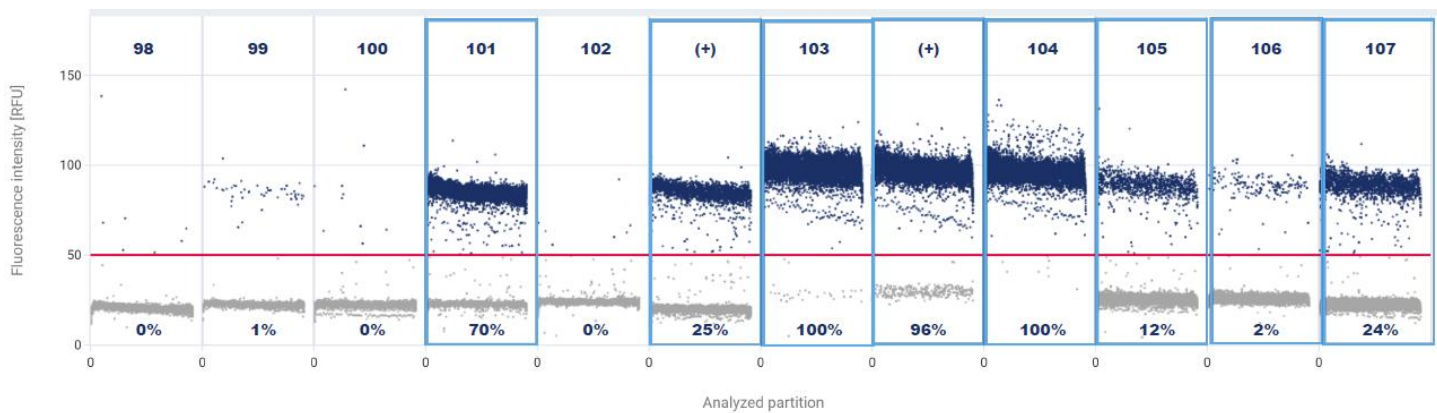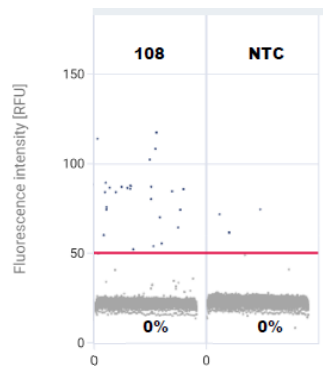

TEST 4: Late-Season Leaves (120 DAP)

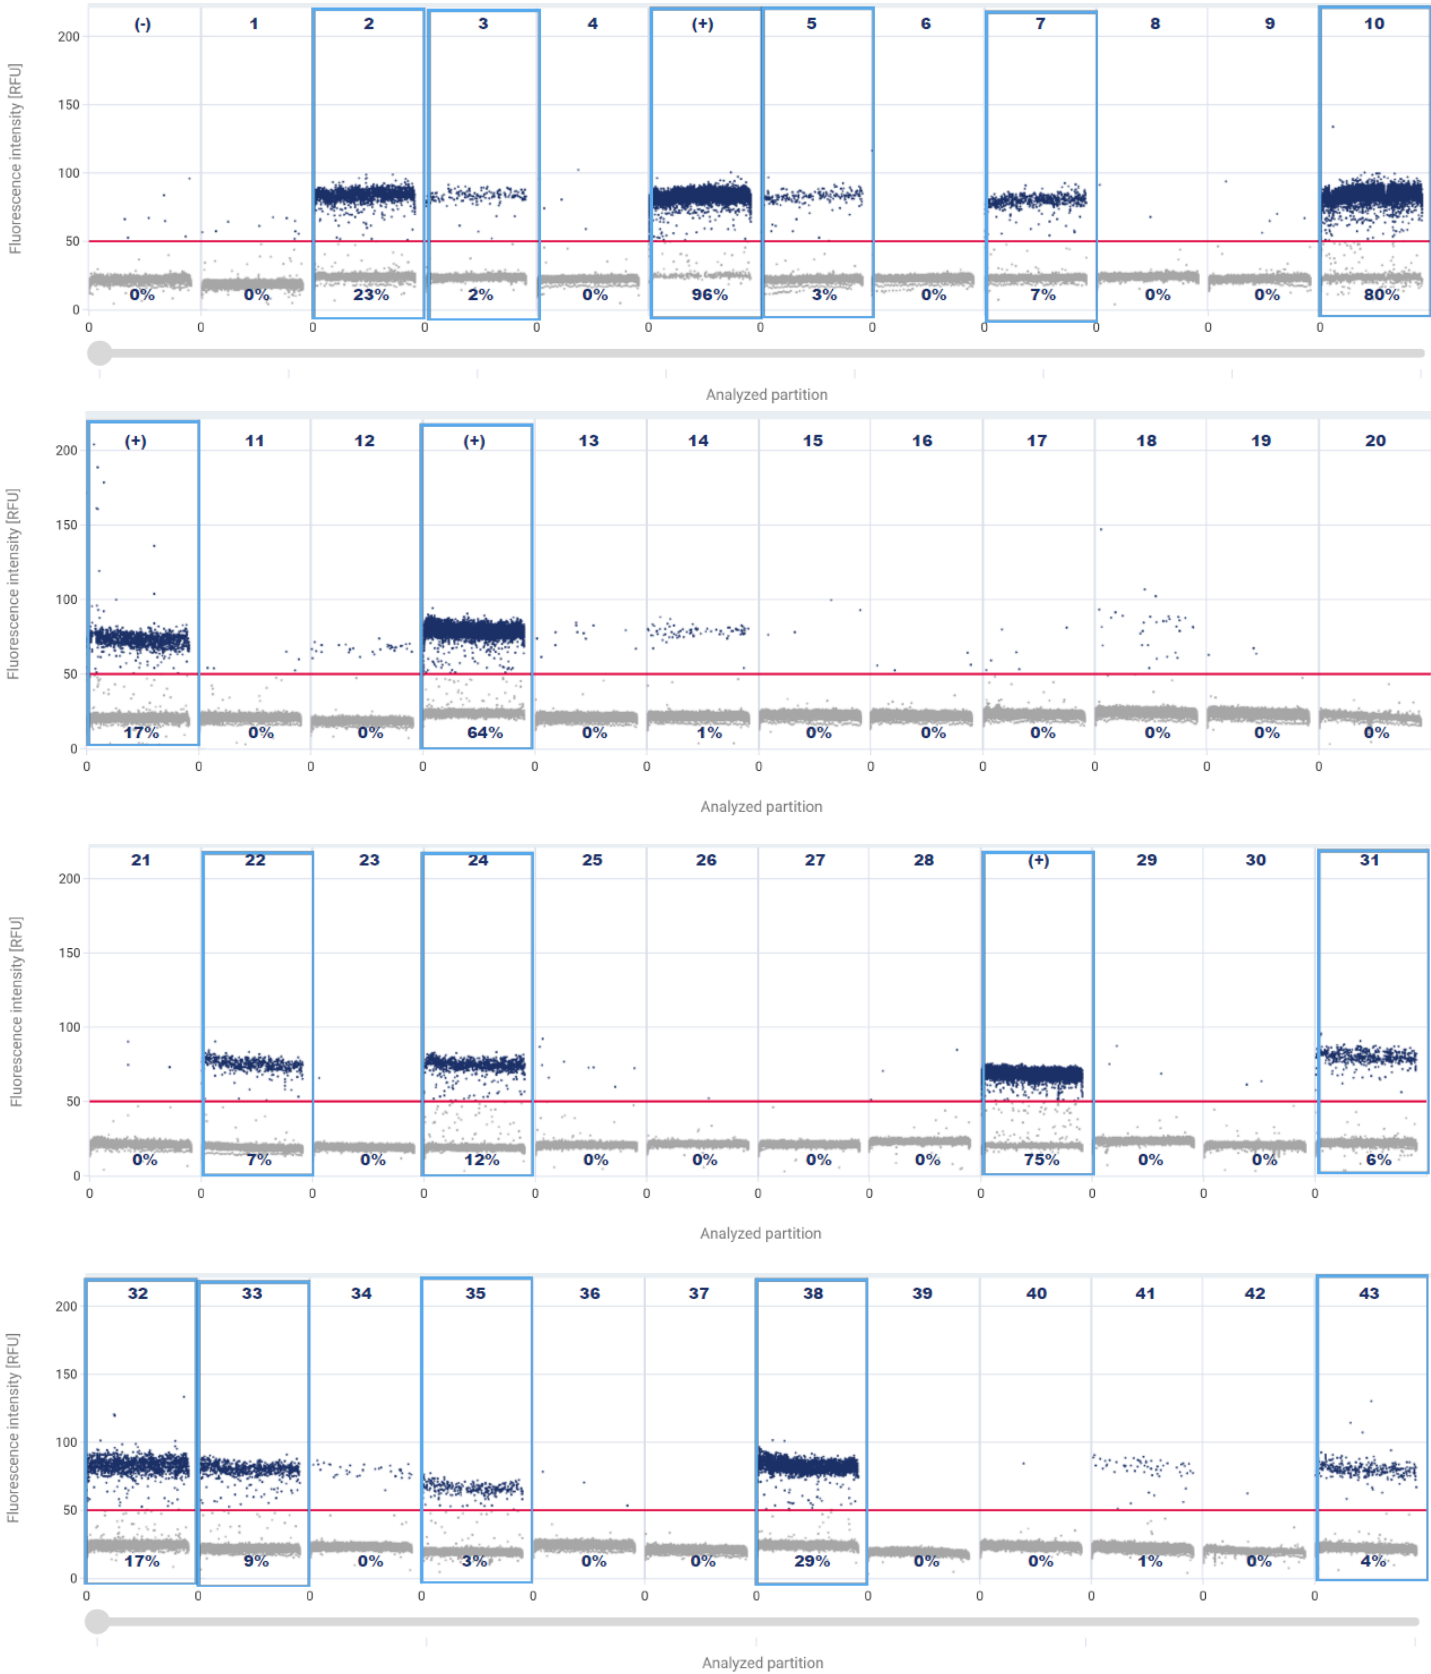



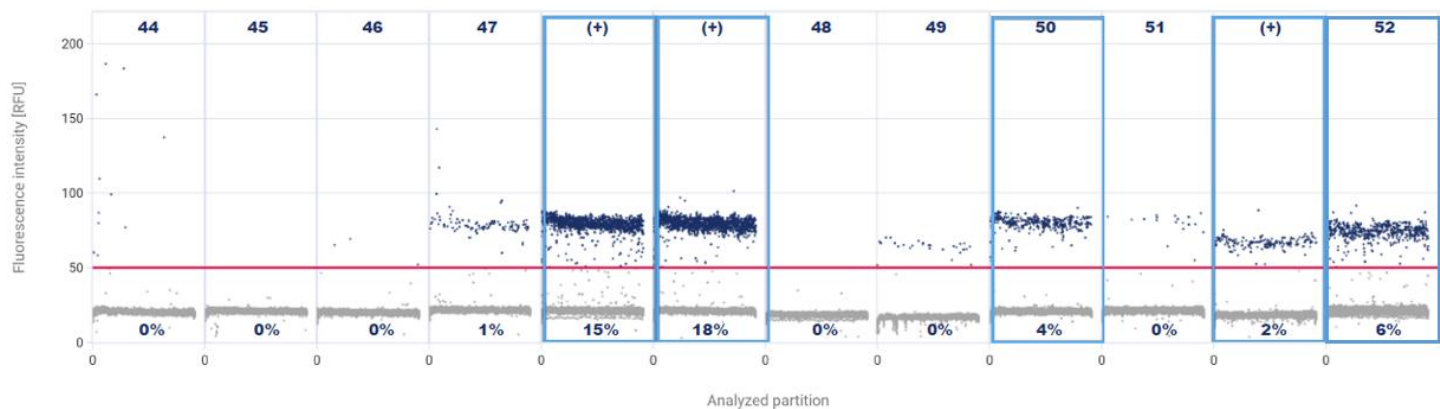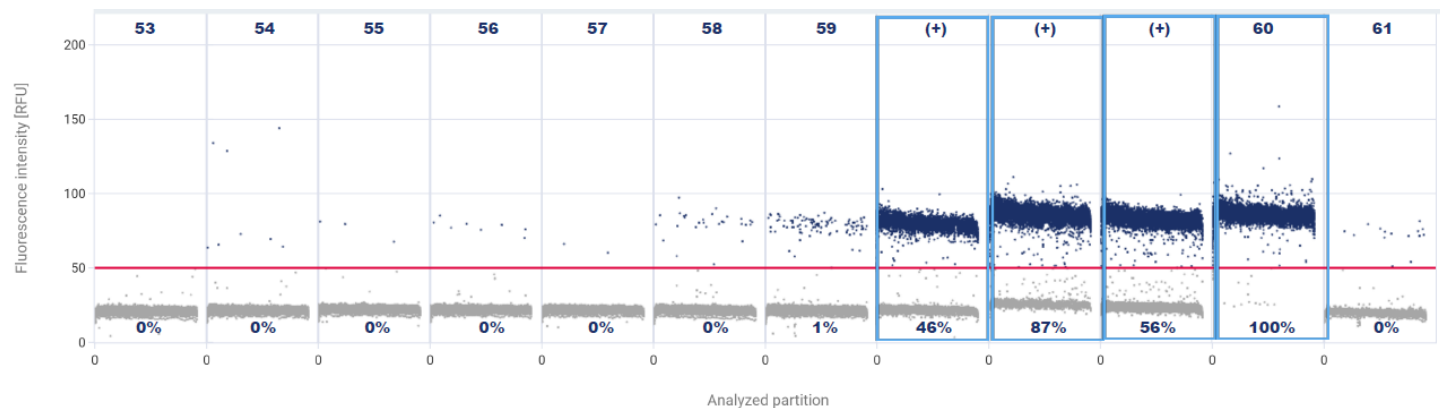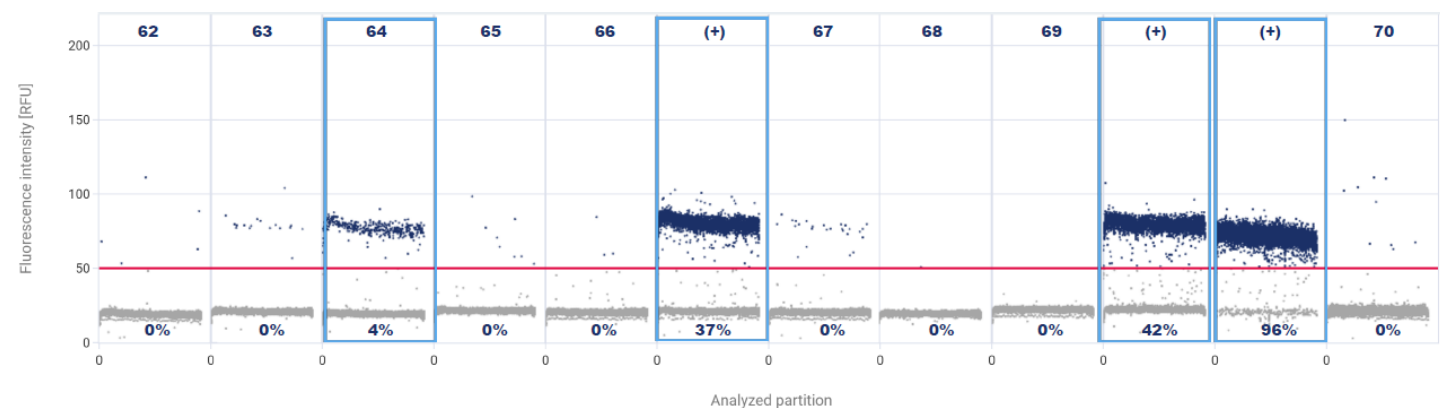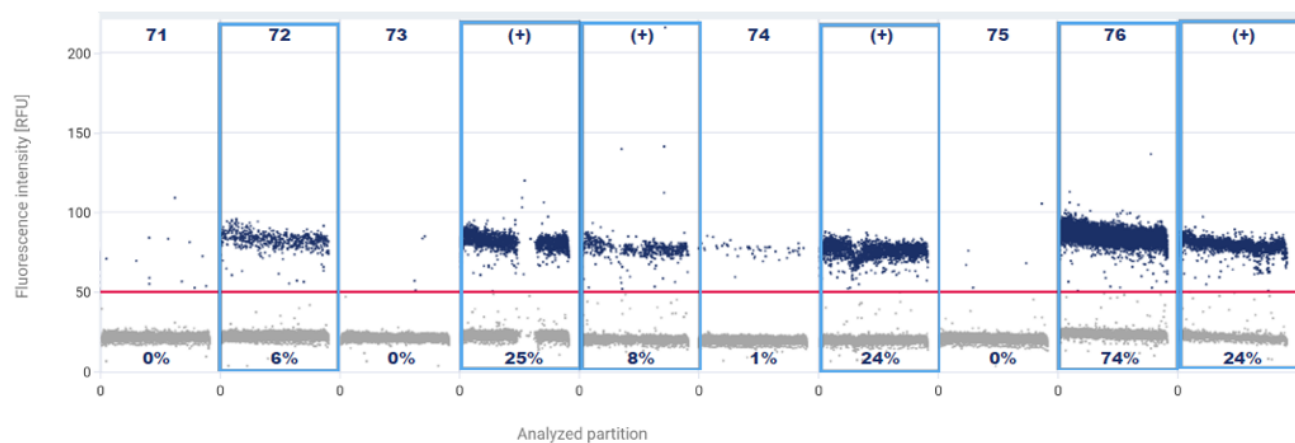

TEST 5: Late-Season Leaves (125 DAP)

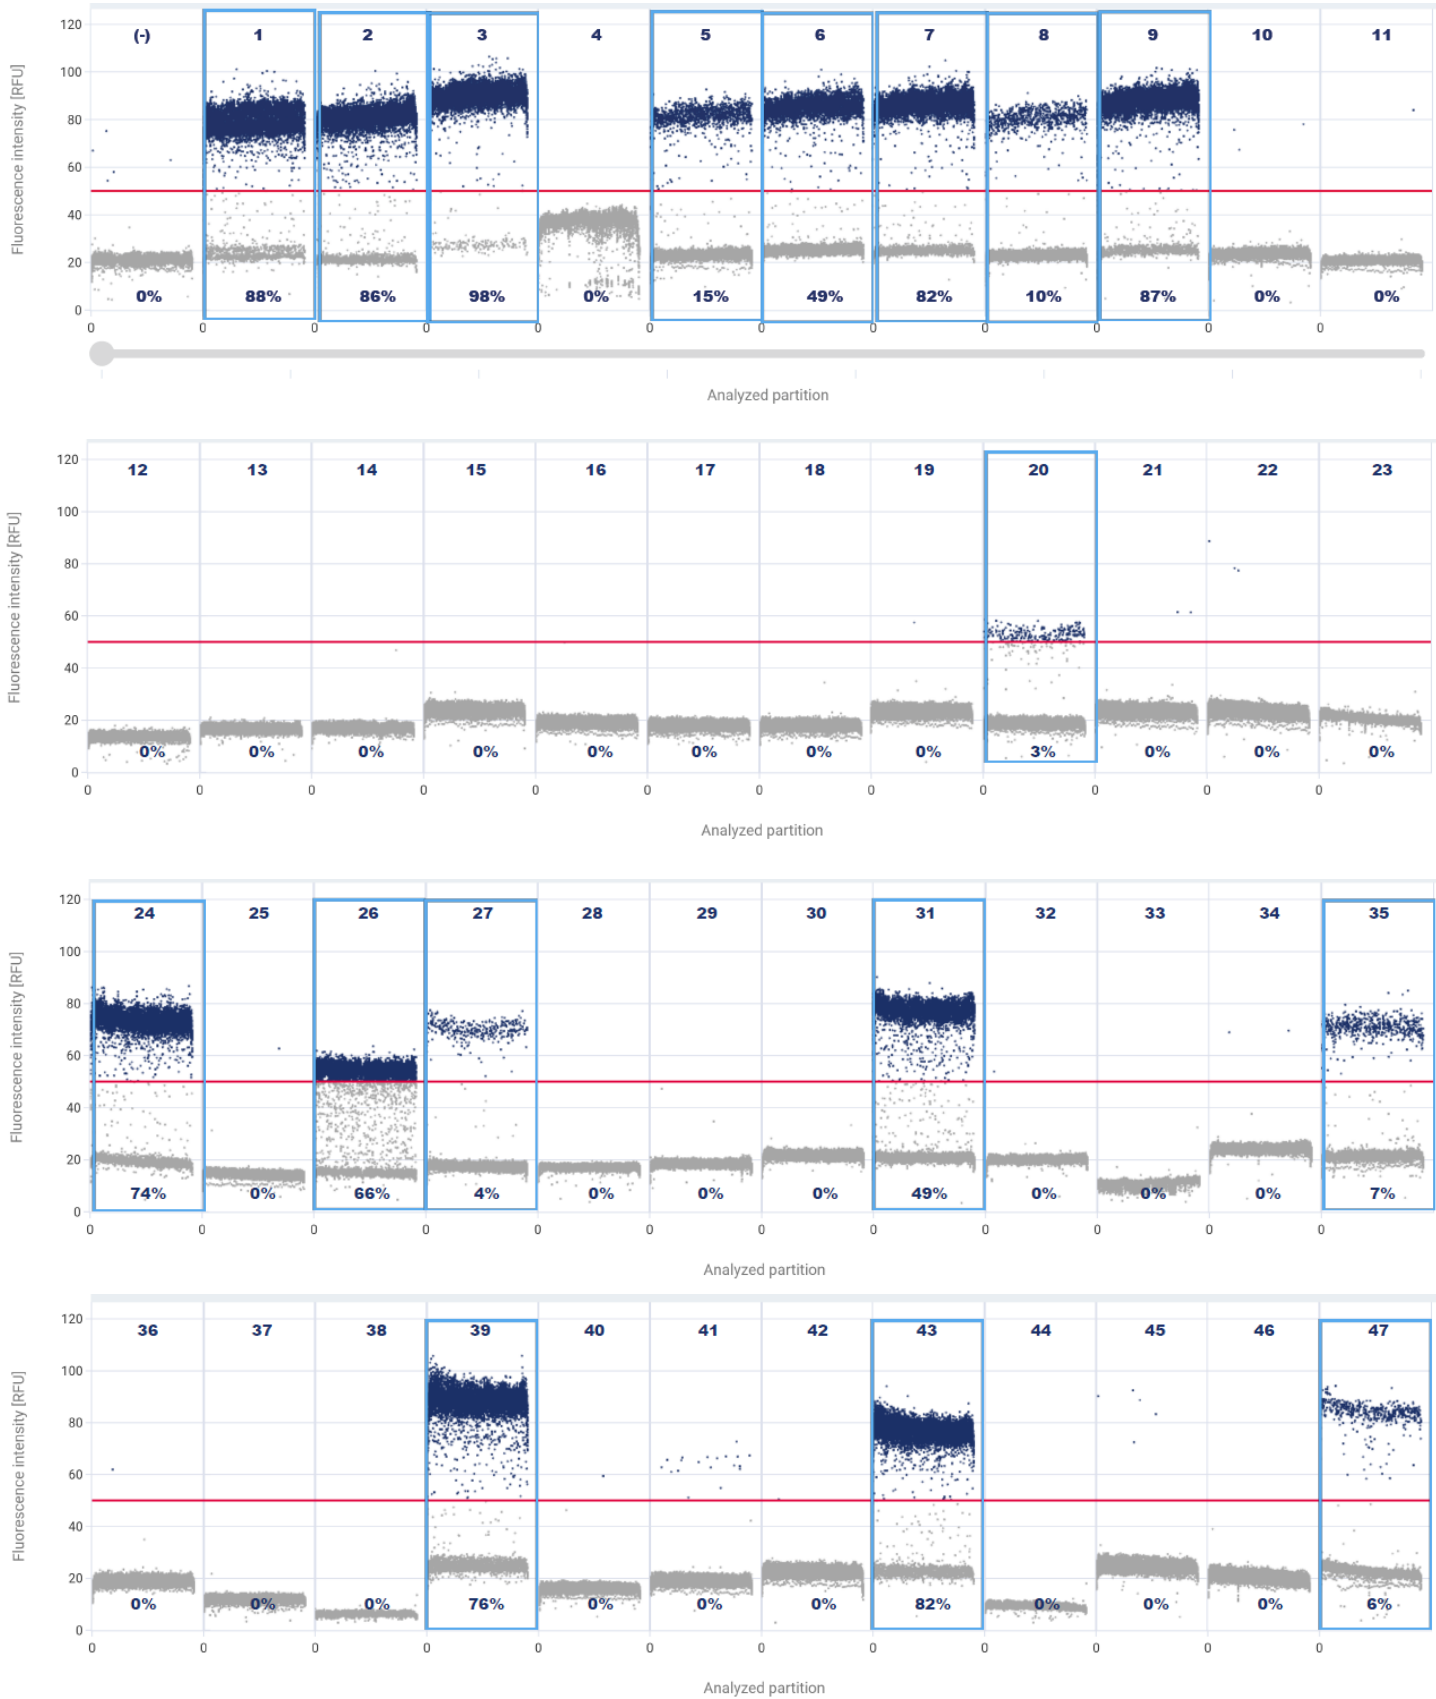



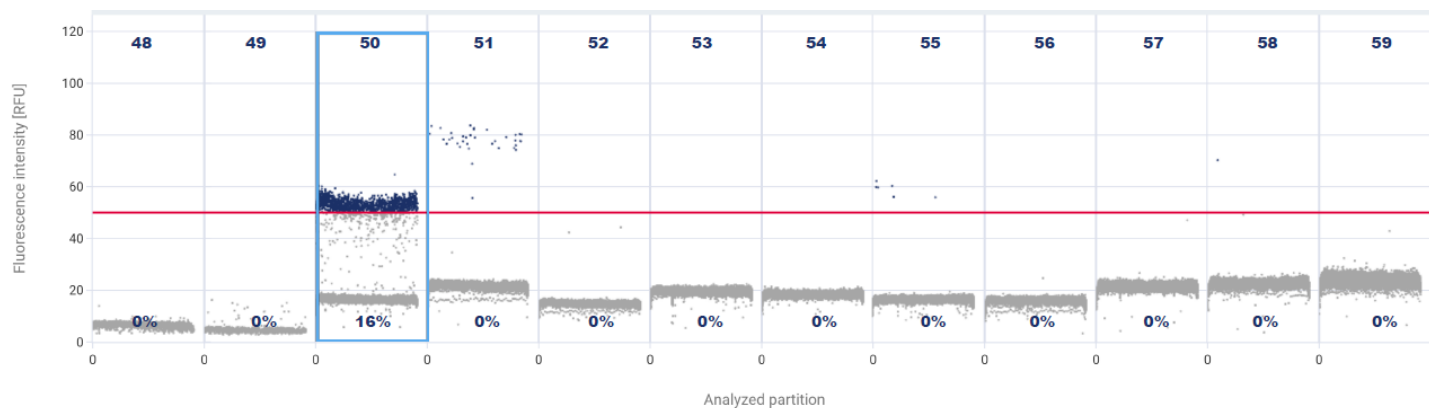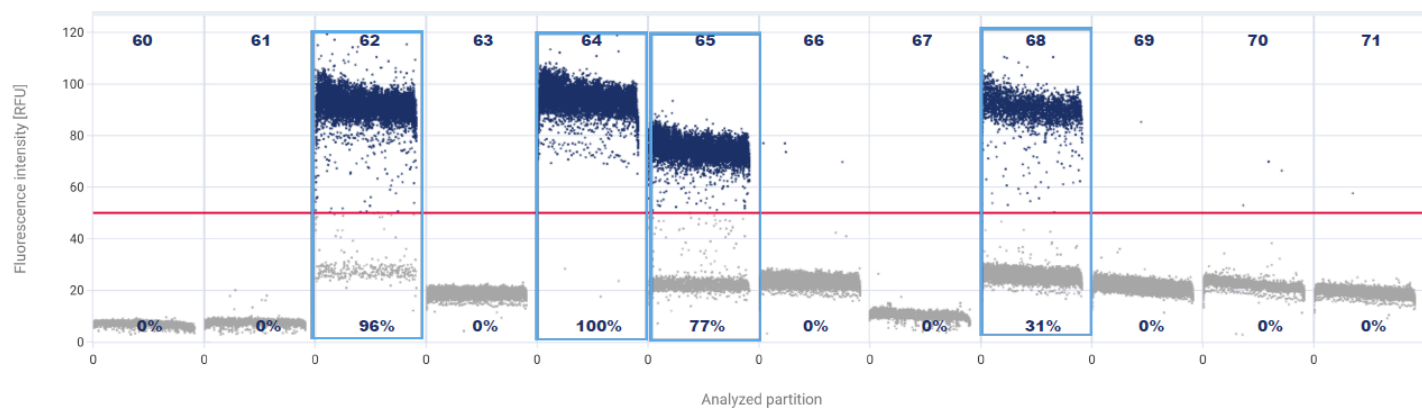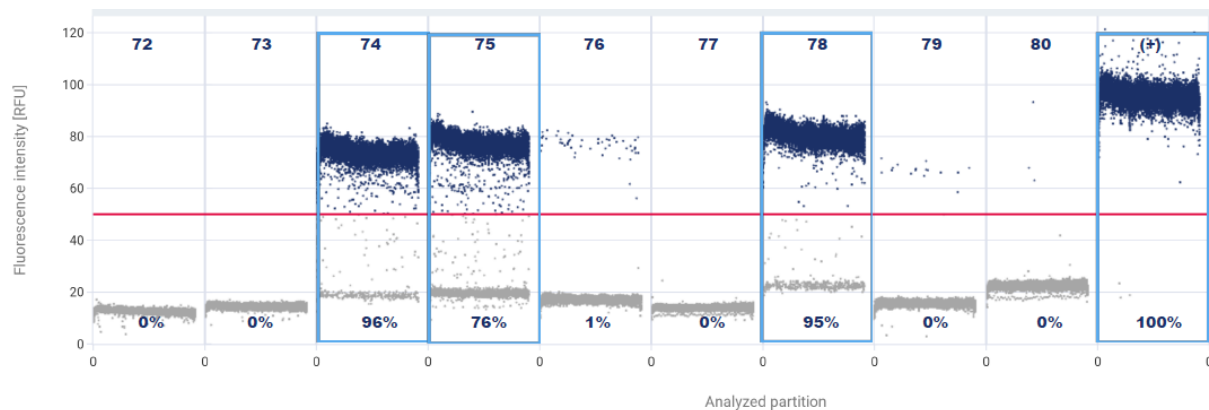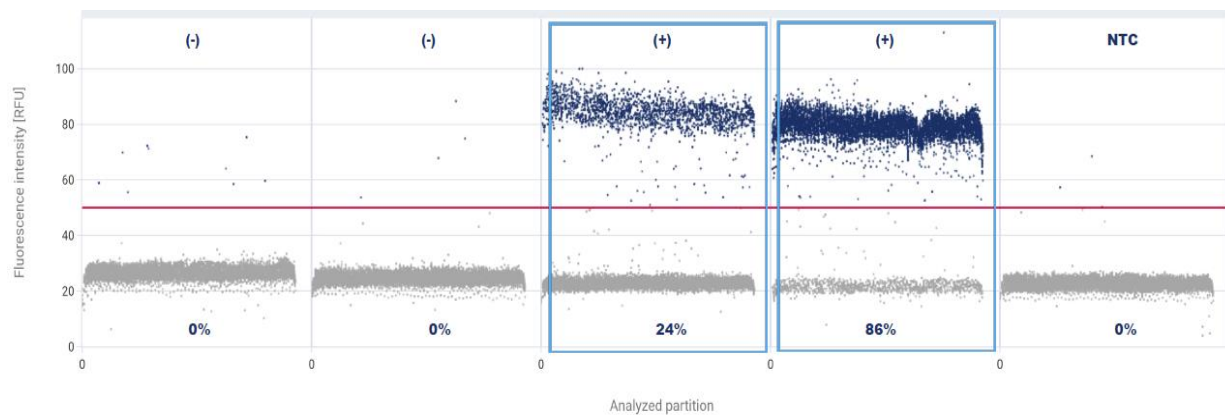

TEST 6: Late-Season Roots (125 DAP)

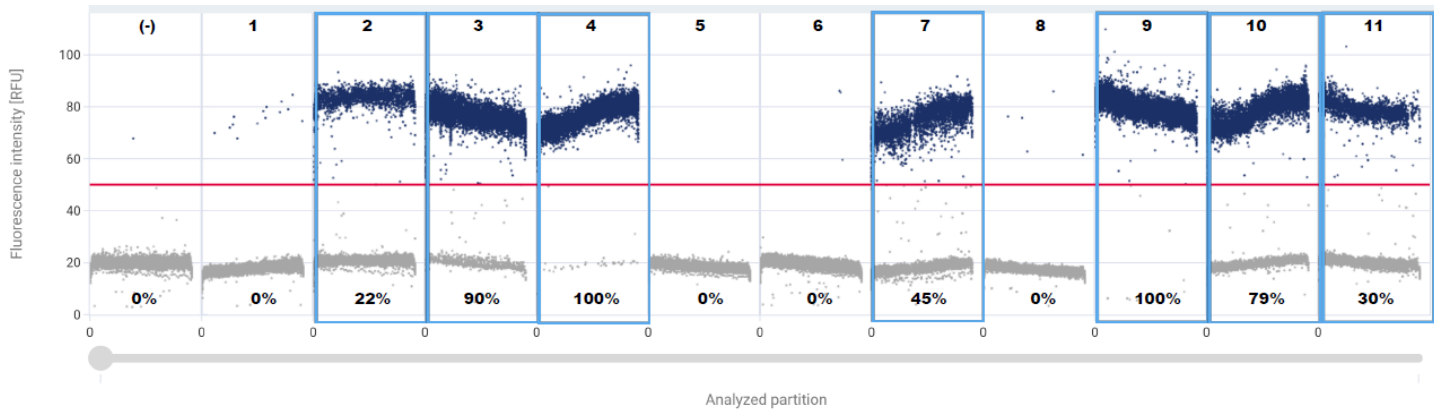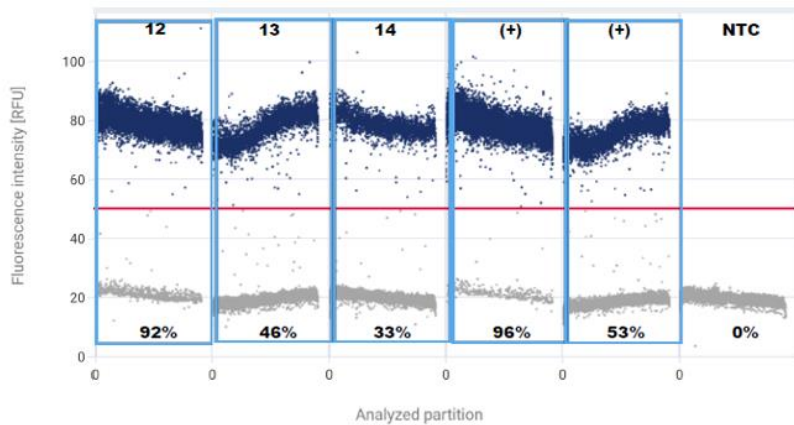

Supplement: s1 [file s1]
